# Supplementary material for: Information from Pharmaceutical Companies and the Quality, Quantity, and Cost of Physicians' Prescribing: A Systematic Review
Source: PubMed Central journal article supplement (PMC2957394; doi:10.1371/journal.pmed.1000352), 2010-10-19
Supplement: pmed.1000352.s004.pdf [file pmed.1000352.s004.pdf]

## **MOOSE Checklist**

### **Reporting of background should include**

|                                       |   |
|---------------------------------------|---|
| Problem definition                    | ✓ |
| Hypothesis statement                  | ✓ |
| Description of study outcome(s)       | ✓ |
| Type of exposure or intervention used | ✓ |
| Type of study designs used            | ✓ |
| Study population                      | ✓ |

### **Reporting of search strategy should include**

|                                                                                         |   |
|-----------------------------------------------------------------------------------------|---|
| Qualifications of searchers (eg, librarians and investigators)                          | ✓ |
| Search strategy, including time period included in the synthesis and keywords           | ✓ |
| Effort to include all available studies, including contact with authors                 | ✓ |
| Databases and registries searched                                                       | ✓ |
| Search software used, name and version, including special features used (eg, explosion) | ✓ |
| Use of hand searching (eg, reference lists of obtained articles)                        | ✓ |
| List of citations located and those excluded, including justification                   | ✓ |
| Method of addressing articles published in languages other than English                 | ✓ |
| Method of handling abstracts and unpublished studies                                    | ✓ |
| Description of any contact with authors                                                 | ✓ |

### **Reporting of methods should include**

|                                                                                                                                                                                                                                                                              |   |
|------------------------------------------------------------------------------------------------------------------------------------------------------------------------------------------------------------------------------------------------------------------------------|---|
| Description of relevance or appropriateness of studies assembled for assessing the hypothesis to be tested                                                                                                                                                                   | ✓ |
| Rationale for the selection and coding of data (eg, sound clinical principles or convenience)                                                                                                                                                                                | ✓ |
| Documentation of how data were classified and coded (eg, multiple raters, blinding, and interrater reliability)                                                                                                                                                              | ✓ |
| Assessment of confounding (eg, comparability of cases and controls in studies where appropriate)                                                                                                                                                                             | ✓ |
| Assessment of study quality, including blinding of quality assessors; stratification or regression on possible predictors of study results                                                                                                                                   | ✓ |
| Assessment of heterogeneity                                                                                                                                                                                                                                                  | ✓ |
| Description of statistical methods (eg, complete description of fixed or random effects models, justification of whether the chosen models account for predictors of study results, dose-response models, or cumulative meta-analysis) in sufficient detail to be replicated | ✓ |
| Provision of appropriate tables and graphics                                                                                                                                                                                                                                 | ✓ |

### **Reporting of results should include**

|                                                                     |   |
|---------------------------------------------------------------------|---|
| Graphic summarizing individual study estimates and overall estimate | ✓ |
| Table giving descriptive information for each study included        | ✓ |
| Results of sensitivity testing (eg, subgroup analysis)              | ✓ |
| Indication of statistical uncertainty of findings                   | ✓ |

### **Reporting of discussion should include**

|                                                                               |   |
|-------------------------------------------------------------------------------|---|
| Quantitative assessment of bias (eg, publication bias)                        | ✓ |
| Justification for exclusion (eg, exclusion of non-English-language citations) | ✓ |
| Assessment of quality of included studies                                     | ✓ |

### **Reporting of conclusions should include**

|                                                                                                                           |   |
|---------------------------------------------------------------------------------------------------------------------------|---|
| Consideration of alternative explanations for observed results                                                            | ✓ |
| Generalization of the conclusions (ie, appropriate for the data presented and within the domain of the literature review) | ✓ |
| Guidelines for future research                                                                                            | x |
| Disclosure of funding source                                                                                              | ✓ |
